# Supplementary material for: An Integrative Eco-Epidemiological Analysis of West Nile Virus Transmission
Source: Springer Nature journal article supplement (doi:10.1007/s10393-017-1249-6), 2017-06-05
Supplement: MOESM3 [file 12339012]

## An Integrative Eco-Epidemiological Analysis of West Nile Virus Transmission

### Technical Appendix 3. Expert-based distribution and abundance of *Culex* mosquitoes and wild birds

#### 3.1 *Culex* mosquitoes

The abundance of the two vectors species, *Culex modestus* and *Cx. pipiens*, was evaluated according to five index classes (0: absent; 1: very low densities; 2: low densities; 3: high densities; 4: very high densities) in each land cover type and for each season, based on literature and expert opinions (Rioux and Arnold, 1955; Rioux, 1958; Service, 1969; Mouchet et al., 1970; Savage et al., 1999; Vinogradova, 2000; Medlock et al., 2005; Balenghien et al., 2006). Considering the number of host-seeking mosquito females in a bird-baited trap per collection night, the five classes were defined as follows: absent: never collected; very low densities: few individuals collected; low densities: 10 to 40 individuals collected; high densities: 40 to 100 individuals collected; very high densities: >100 individuals collected. For each land cover type, we considered two distinct activities to map: *i*) ‘breeding areas’, defined as areas where water bodies of different types, such as rice fields, water ponds, marshes, etc, are available for mosquito females to lay their eggs, and *ii*) ‘host-seeking areas’, defined as areas where mosquito females do not oviposit but where they can move to seek a host to take the blood meal necessary to develop their eggs. “Urban areas” (dense urban areas and suburban areas) were identified as potential breeding areas for *Cx. pipiens*, as this species may breed in small containers likely to be present in these classes (Table S4). We then used the mosquito database information and GIS spatial analysis tools (spatial selections) to map the most realistic distribution of mosquitoes for each season and each species, taking into account the dispersal distance around the breeding areas. This active dispersal for mosquitoes usually consists of relatively short distances (about a few hundred

meters), although longer flights of >1 km may occur if hosts and oviposition sites are widely separated (Service, 1997). Here we considered that mosquitoes can disperse from the breeding areas into favourable host-seeking areas neighbouring the breeding areas.

For each species and season, the land cover map (Technical Appendix 2, Figure S1) was thus reclassified to produce a mosquito abundance index map:

- each land cover object was classified as 'breeding site', 'host-seeking site' or 'other' according to its land cover type and the mosquito database,
- a mosquito abundance index value was attributed to each land cover object: 'breeding site' objects and 'host-seeking site' objects neighbouring 'breeding sites', according to the land cover type and the associated mosquito data; the null-value was attributed to all other objects.

### **3.2. Wild birds**

The abundance of each of the 180 wild bird species (*i.e.* all wild bird species present in the study area excluding rare and vagrant species) was evaluated according to four index classes (0: absent - the species is never or accidentally observed; 1: uncommon; 2: frequent; 3: common) in each land cover type and for each season based on ornithologist expert opinions.

## References

- Balenghien T, Fouque F, Sabatier P, Bicout DJ (2006) Horse-, bird-, and human-seeking behavior and seasonal abundance of mosquitoes in a West Nile Virus focus of southern France. *Journal of Medical Entomology*. 43: 936-946.
- Medlock JM, Snow KR, Leach S (2005) Potential transmission of West Nile virus in the British Isles: an ecological review of candidate mosquito bridge vectors. *Med Vet Entomol*. 19(1): 2-21.
- Mouchet J, Rageau J, Laumond C, Hannoun C, Beytout D, Oudar J, Corniou B, Chippaux A (1970) Epidémiologie du virus West Nile: étude d'un foyer en Camargue V. Le vecteur: *Culex modestus* Ficalbi Diptera; Culicidae. *Annales de l'Institut Pasteur (Paris)*. 118: 839-855.
- Rioux JA (1958) Les Culicidés du "Midi méditerranéen". Etude systématique et écologique. Paris, France, Editions Paul Lechevalier.
- Rioux JA, Arnold M (1955) Les Culicidés de Camargue (étude systématique et écologique). Paris, France, Société Nationale d'Acclimatation
- Savage HM, Ceianu C, Nicolescu G, Kearabatsos N, Lanciotti R, Vladimirescu A, Laiv L, Ungureanu A, Romanca C, Tsai TF (1999) Entomological and avian investigation of an epidemic of West Nile fever in Romania in 1996, with serologic and molecular characterization of a virus isolate from mosquitoes. *American Journal of Tropical Medicine and Hygiene*. 61: 600-611.
- Service MW (1969) Observations on the ecology of some British mosquitoes. *Bulletin of Entomological Research*. 59: 161-194.
- Service MW (1997) Mosquito (Diptera: Culicidae) dispersal--the long and short of it. *J Med Entomol*. 34(6): 579-588.
- Vinogradova EB (2000) *Culex pipiens pipiens* mosquitoes: taxonomy, distribution, ecology, physiology, genetics, applied importance and control. SoPa-Moscow, Russia, PENSOFT Publishers.

**Table S4. *Culex modestus* and *Culex pipiens* breeding sites, Camargue region, Southern France.**

| <b>Species</b>        | <b>Season</b> | <b>Habitat</b>                   | <b>Activity</b> | <b>Occurrence</b> |
|-----------------------|---------------|----------------------------------|-----------------|-------------------|
| <i>Culex modestus</i> | Spring        | Sea                              | Breeding        | absent            |
| <i>Culex modestus</i> | Spring        | Beaches and herbaceous dunes     | Breeding        | absent            |
| <i>Culex modestus</i> | Spring        | Dune forest                      | Breeding        | absent            |
| <i>Culex modestus</i> | Spring        | Salt water lagoon                | Breeding        | uncommon          |
| <i>Culex modestus</i> | Spring        | Salty bare soil                  | Breeding        | absent            |
| <i>Culex modestus</i> | Spring        | Salt marsh vegetation            | Breeding        | uncommon          |
| <i>Culex modestus</i> | Spring        | Floating aquatic vegetation      | Breeding        | uncommon          |
| <i>Culex modestus</i> | Spring        | Open water (fresh water)         | Breeding        | uncommon          |
| <i>Culex modestus</i> | Spring        | Mud flats with low salinity      | Breeding        | absent            |
| <i>Culex modestus</i> | Spring        | Reed beds                        | Breeding        | frequent          |
| <i>Culex modestus</i> | Spring        | Marshes with scirpus and rushes  | Breeding        | uncommon          |
| <i>Culex modestus</i> | Spring        | Rush wetland temporarily flooded | Breeding        | absent            |
| <i>Culex modestus</i> | Spring        | Rush prairies never flooded      | Breeding        | absent            |
| <i>Culex modestus</i> | Spring        | Dry herbaceous areas             | Breeding        | absent            |
| <i>Culex modestus</i> | Spring        | Riparian forest                  | Breeding        | uncommon          |
| <i>Culex modestus</i> | Spring        | Hedges                           | Breeding        | absent            |
| <i>Culex modestus</i> | Spring        | Forest                           | Breeding        | absent            |
| <i>Culex modestus</i> | Spring        | Scrubland                        | Breeding        | absent            |
| <i>Culex modestus</i> | Spring        | Vineyard                         | Breeding        | absent            |
| <i>Culex modestus</i> | Spring        | Bare soil                        | Breeding        | absent            |
| <i>Culex modestus</i> | Spring        | Fruit trees                      | Breeding        | absent            |
| <i>Culex modestus</i> | Spring        | Rice fields                      | Breeding        | frequent          |
| <i>Culex modestus</i> | Spring        | Cereals                          | Breeding        | absent            |
| <i>Culex modestus</i> | Spring        | Fallow land                      | Breeding        | absent            |
| <i>Culex modestus</i> | Spring        | Dense urban areas                | Breeding        | absent            |
| <i>Culex modestus</i> | Spring        | Suburban areas                   | Breeding        | absent            |
| <i>Culex modestus</i> | Spring        | Saltworks                        | Breeding        | absent            |
| <i>Culex modestus</i> | Summer        | Sea                              | Breeding        | absent            |
| <i>Culex modestus</i> | Summer        | Beaches and herbaceous dunes     | Breeding        | absent            |
| <i>Culex modestus</i> | Summer        | Dune forest                      | Breeding        | absent            |
| <i>Culex modestus</i> | Summer        | Salt water lagoon                | Breeding        | uncommon          |
| <i>Culex modestus</i> | Summer        | Salty bare soil                  | Breeding        | absent            |
| <i>Culex modestus</i> | Summer        | Salt marsh vegetation            | Breeding        | frequent          |
| <i>Culex modestus</i> | Summer        | Floating aquatic vegetation      | Breeding        | frequent          |
| <i>Culex modestus</i> | Summer        | Open water (fresh water)         | Breeding        | frequent          |
| <i>Culex modestus</i> | Summer        | Mud flats with low salinity      | Breeding        | uncommon          |
| <i>Culex modestus</i> | Summer        | Reed beds                        | Breeding        | abundant          |
| <i>Culex modestus</i> | Summer        | Marshes with scirpus and rushes  | Breeding        | frequent          |
| <i>Culex modestus</i> | Summer        | Rush wetland temporarily flooded | Breeding        | uncommon          |
| <i>Culex modestus</i> | Summer        | Rush prairies never flooded      | Breeding        | absent            |

|                       |        |                                  |          |          |
|-----------------------|--------|----------------------------------|----------|----------|
| <i>Culex modestus</i> | Summer | Dry herbaceous areas             | Breeding | absent   |
| <i>Culex modestus</i> | Summer | Riparian forest                  | Breeding | uncommon |
| <i>Culex modestus</i> | Summer | Hedges                           | Breeding | absent   |
| <i>Culex modestus</i> | Summer | Forest                           | Breeding | uncommon |
| <i>Culex modestus</i> | Summer | Scrubland                        | Breeding | absent   |
| <i>Culex modestus</i> | Summer | Vineyard                         | Breeding | absent   |
| <i>Culex modestus</i> | Summer | Bare soil                        | Breeding | absent   |
| <i>Culex modestus</i> | Summer | Fruit trees                      | Breeding | absent   |
| <i>Culex modestus</i> | Summer | Rice fields                      | Breeding | common   |
| <i>Culex modestus</i> | Summer | Cereals                          | Breeding | absent   |
| <i>Culex modestus</i> | Summer | Fallow land                      | Breeding | absent   |
| <i>Culex modestus</i> | Summer | Dense urban areas                | Breeding | uncommon |
| <i>Culex modestus</i> | Summer | Suburban areas                   | Breeding | uncommon |
| <i>Culex modestus</i> | Summer | Saltworks                        | Breeding | absent   |
| <i>Culex modestus</i> | Autumn | Sea                              | Breeding | absent   |
| <i>Culex modestus</i> | Autumn | Beaches and herbaceous dunes     | Breeding | absent   |
| <i>Culex modestus</i> | Autumn | Dune forest                      | Breeding | absent   |
| <i>Culex modestus</i> | Autumn | Salt water lagoon                | Breeding | absent   |
| <i>Culex modestus</i> | Autumn | Salty bare soil                  | Breeding | absent   |
| <i>Culex modestus</i> | Autumn | Salt marsh vegetation            | Breeding | uncommon |
| <i>Culex modestus</i> | Autumn | Floating aquatic vegetation      | Breeding | uncommon |
| <i>Culex modestus</i> | Autumn | Open water (fresh water)         | Breeding | uncommon |
| <i>Culex modestus</i> | Autumn | Mud flats with low salinity      | Breeding | absent   |
| <i>Culex modestus</i> | Autumn | Reed beds                        | Breeding | uncommon |
| <i>Culex modestus</i> | Autumn | Marshes with scirpus and rushes  | Breeding | uncommon |
| <i>Culex modestus</i> | Autumn | Rush wetland temporarily flooded | Breeding | absent   |
| <i>Culex modestus</i> | Autumn | Rush prairies never flooded      | Breeding | absent   |
| <i>Culex modestus</i> | Autumn | Dry herbaceous areas             | Breeding | absent   |
| <i>Culex modestus</i> | Autumn | Riparian forest                  | Breeding | absent   |
| <i>Culex modestus</i> | Autumn | Hedges                           | Breeding | absent   |
| <i>Culex modestus</i> | Autumn | Forest                           | Breeding | absent   |
| <i>Culex modestus</i> | Autumn | Scrubland                        | Breeding | absent   |
| <i>Culex modestus</i> | Autumn | Vineyard                         | Breeding | absent   |
| <i>Culex modestus</i> | Autumn | Bare soil                        | Breeding | absent   |
| <i>Culex modestus</i> | Autumn | Fruit trees                      | Breeding | absent   |
| <i>Culex modestus</i> | Autumn | Rice fields                      | Breeding | frequent |
| <i>Culex modestus</i> | Autumn | Cereals                          | Breeding | absent   |
| <i>Culex modestus</i> | Autumn | Fallow land                      | Breeding | absent   |
| <i>Culex modestus</i> | Autumn | Dense urban areas                | Breeding | absent   |
| <i>Culex modestus</i> | Autumn | Suburban areas                   | Breeding | absent   |
| <i>Culex modestus</i> | Autumn | Saltworks                        | Breeding | absent   |
| <i>Culex pipiens</i>  | Spring | Sea                              | Breeding | absent   |
| <i>Culex pipiens</i>  | Spring | Beaches and herbaceous dunes     | Breeding | absent   |
| <i>Culex pipiens</i>  | Spring | Dune forest                      | Breeding | absent   |
| <i>Culex pipiens</i>  | Spring | Salt water lagoon                | Breeding | absent   |

|                      |        |                                  |          |          |
|----------------------|--------|----------------------------------|----------|----------|
| <i>Culex pipiens</i> | Spring | Salty bare soil                  | Breeding | absent   |
| <i>Culex pipiens</i> | Spring | Salt marsh vegetation            | Breeding | absent   |
| <i>Culex pipiens</i> | Spring | Floating aquatic vegetation      | Breeding | uncommon |
| <i>Culex pipiens</i> | Spring | Open water (fresh water)         | Breeding | frequent |
| <i>Culex pipiens</i> | Spring | Mud flats with low salinity      | Breeding | uncommon |
| <i>Culex pipiens</i> | Spring | Reed beds                        | Breeding | uncommon |
| <i>Culex pipiens</i> | Spring | Marshes with scirpus and rushes  | Breeding | uncommon |
| <i>Culex pipiens</i> | Spring | Rush wetland temporarily flooded | Breeding | uncommon |
| <i>Culex pipiens</i> | Spring | Rush prairies never flooded      | Breeding | uncommon |
| <i>Culex pipiens</i> | Spring | Dry herbaceous areas             | Breeding | absent   |
| <i>Culex pipiens</i> | Spring | Riparian forest                  | Breeding | uncommon |
| <i>Culex pipiens</i> | Spring | Hedges                           | Breeding | absent   |
| <i>Culex pipiens</i> | Spring | Forest                           | Breeding | uncommon |
| <i>Culex pipiens</i> | Spring | Scrubland                        | Breeding | absent   |
| <i>Culex pipiens</i> | Spring | Vineyard                         | Breeding | absent   |
| <i>Culex pipiens</i> | Spring | Bare soil                        | Breeding | absent   |
| <i>Culex pipiens</i> | Spring | Fruit trees                      | Breeding | uncommon |
| <i>Culex pipiens</i> | Spring | Rice fields                      | Breeding | common   |
| <i>Culex pipiens</i> | Spring | Cereals                          | Breeding | absent   |
| <i>Culex pipiens</i> | Spring | Fallow land                      | Breeding | absent   |
| <i>Culex pipiens</i> | Spring | Dense urban areas                | Breeding | uncommon |
| <i>Culex pipiens</i> | Spring | Suburban areas                   | Breeding | frequent |
| <i>Culex pipiens</i> | Spring | Saltworks                        | Breeding | absent   |
| <i>Culex pipiens</i> | Summer | Sea                              | Breeding | absent   |
| <i>Culex pipiens</i> | Summer | Beaches and herbaceous dunes     | Breeding | absent   |
| <i>Culex pipiens</i> | Summer | Dune forest                      | Breeding | absent   |
| <i>Culex pipiens</i> | Summer | Salt water lagoon                | Breeding | absent   |
| <i>Culex pipiens</i> | Summer | Salty bare soil                  | Breeding | absent   |
| <i>Culex pipiens</i> | Summer | Salt marsh vegetation            | Breeding | absent   |
| <i>Culex pipiens</i> | Summer | Floating aquatic vegetation      | Breeding | common   |
| <i>Culex pipiens</i> | Summer | Open water (fresh water)         | Breeding | common   |
| <i>Culex pipiens</i> | Summer | Mud flats with low salinity      | Breeding | uncommon |
| <i>Culex pipiens</i> | Summer | Reed beds                        | Breeding | common   |
| <i>Culex pipiens</i> | Summer | Marshes with scirpus and rushes  | Breeding | frequent |
| <i>Culex pipiens</i> | Summer | Rush wetland temporarily flooded | Breeding | frequent |
| <i>Culex pipiens</i> | Summer | Rush prairies never flooded      | Breeding | uncommon |
| <i>Culex pipiens</i> | Summer | Dry herbaceous areas             | Breeding | absent   |
| <i>Culex pipiens</i> | Summer | Riparian forest                  | Breeding | common   |
| <i>Culex pipiens</i> | Summer | Hedges                           | Breeding | absent   |
| <i>Culex pipiens</i> | Summer | Forest                           | Breeding | frequent |
| <i>Culex pipiens</i> | Summer | Scrubland                        | Breeding | absent   |
| <i>Culex pipiens</i> | Summer | Vineyard                         | Breeding | absent   |
| <i>Culex pipiens</i> | Summer | Bare soil                        | Breeding | absent   |
| <i>Culex pipiens</i> | Summer | Fruit trees                      | Breeding | uncommon |
| <i>Culex pipiens</i> | Summer | Rice fields                      | Breeding | abundant |

|                      |        |                                  |          |          |
|----------------------|--------|----------------------------------|----------|----------|
| <i>Culex pipiens</i> | Summer | Cereals                          | Breeding | absent   |
| <i>Culex pipiens</i> | Summer | Fallow land                      | Breeding | absent   |
| <i>Culex pipiens</i> | Summer | Dense urban areas                | Breeding | common   |
| <i>Culex pipiens</i> | Summer | Suburban areas                   | Breeding | abundant |
| <i>Culex pipiens</i> | Summer | Saltworks                        | Breeding | absent   |
| <i>Culex pipiens</i> | Autumn | Sea                              | Breeding | absent   |
| <i>Culex pipiens</i> | Autumn | Beaches and herbaceous dunes     | Breeding | absent   |
| <i>Culex pipiens</i> | Autumn | Dune forest                      | Breeding | absent   |
| <i>Culex pipiens</i> | Autumn | Salt water lagoon                | Breeding | absent   |
| <i>Culex pipiens</i> | Autumn | Salty bare soil                  | Breeding | absent   |
| <i>Culex pipiens</i> | Autumn | Salt marsh vegetation            | Breeding | absent   |
| <i>Culex pipiens</i> | Autumn | Floating aquatic vegetation      | Breeding | absent   |
| <i>Culex pipiens</i> | Autumn | Open water (fresh water)         | Breeding | frequent |
| <i>Culex pipiens</i> | Autumn | Mud flats with low salinity      | Breeding | absent   |
| <i>Culex pipiens</i> | Autumn | Reed beds                        | Breeding | absent   |
| <i>Culex pipiens</i> | Autumn | Marshes with scirpus and rushes  | Breeding | uncommon |
| <i>Culex pipiens</i> | Autumn | Rush wetland temporarily flooded | Breeding | uncommon |
| <i>Culex pipiens</i> | Autumn | Rush prairies never flooded      | Breeding | uncommon |
| <i>Culex pipiens</i> | Autumn | Dry herbaceous areas             | Breeding | absent   |
| <i>Culex pipiens</i> | Autumn | Riparian forest                  | Breeding | frequent |
| <i>Culex pipiens</i> | Autumn | Hedges                           | Breeding | absent   |
| <i>Culex pipiens</i> | Autumn | Forest                           | Breeding | uncommon |
| <i>Culex pipiens</i> | Autumn | Scrubland                        | Breeding | absent   |
| <i>Culex pipiens</i> | Autumn | Vineyard                         | Breeding | absent   |
| <i>Culex pipiens</i> | Autumn | Bare soil                        | Breeding | absent   |
| <i>Culex pipiens</i> | Autumn | Fruit trees                      | Breeding | absent   |
| <i>Culex pipiens</i> | Autumn | Rice fields                      | Breeding | absent   |
| <i>Culex pipiens</i> | Autumn | Cereals                          | Breeding | absent   |
| <i>Culex pipiens</i> | Autumn | Fallow land                      | Breeding | absent   |
| <i>Culex pipiens</i> | Autumn | Dense urban areas                | Breeding | frequent |
| <i>Culex pipiens</i> | Autumn | Suburban areas                   | Breeding | frequent |
| <i>Culex pipiens</i> | Autumn | Saltworks                        | Breeding | absent   |
