# Supplementary material for: An Integrative Eco-Epidemiological Analysis of West Nile Virus Transmission
Source: Springer Nature journal article supplement (doi:10.1007/s10393-017-1249-6), 2017-06-05
Supplement: MOESM6 [file 12339012]

## An Integrative Eco-Epidemiological Analysis of West Nile Virus Transmission

### Technical Appendix 6. Results.

**Table S8: List of all regression models evaluating the variation in seroprevalence in magpies in relation to West Nile Virus circulation index, resulting from the different scenarios of introduction and amplification/dispersal, Camargue area, Southern France, and ranked according to their normalized Akaike weights ( $w_{AIC}$ )**

| Scenario | Introduction <sup>1</sup> | Amplification       |                   |                                | AIC     | $w_{AIC}$ |
|----------|---------------------------|---------------------|-------------------|--------------------------------|---------|-----------|
|          |                           | Vector <sup>2</sup> | Host <sup>3</sup> | 'Dilution effect' <sup>4</sup> |         |           |
| I1bA321  | 1b                        | 3                   | 2                 | 1                              | 171.319 | 0.296     |
| I1aA121  | 1a                        | 1                   | 2                 | 1                              | 173.030 | 0.126     |
| I1bA121  | 1b                        | 1                   | 2                 | 1                              | 173.645 | 0.092     |
| I1aA321  | 1a                        | 3                   | 2                 | 1                              | 173.931 | 0.080     |
| I2cA122  | 2c                        | 1                   | 2                 | 2                              | 173.967 | 0.079     |
| I2bA321  | 2b                        | 3                   | 2                 | 1                              | 174.729 | 0.054     |
| I2cA121  | 2c                        | 1                   | 2                 | 1                              | 174.930 | 0.049     |
| I2bA222  | 2b                        | 2                   | 2                 | 2                              | 175.590 | 0.035     |
| I2cA321  | 2c                        | 3                   | 2                 | 1                              | 175.683 | 0.033     |
| I2cA322  | 2c                        | 3                   | 2                 | 2                              | 175.915 | 0.030     |
| I2cA222  | 2c                        | 2                   | 2                 | 2                              | 176.183 | 0.026     |
| I1aA221  | 1a                        | 2                   | 2                 | 1                              | 176.220 | 0.026     |
| I2bA221  | 2b                        | 2                   | 2                 | 1                              | 176.847 | 0.019     |
| I2bA121  | 2b                        | 1                   | 2                 | 1                              | 176.852 | 0.019     |
| I2cA221  | 2c                        | 2                   | 2                 | 1                              | 177.300 | 0.015     |
| I1aA222  | 1a                        | 2                   | 2                 | 2                              | 177.385 | 0.014     |
| I1bA322  | 1b                        | 3                   | 2                 | 2                              | 179.339 | 0.005     |
| I2bA122  | 2b                        | 1                   | 2                 | 2                              | 181.319 | 0.002     |
| I1bA122  | 1b                        | 1                   | 2                 | 2                              | 183.783 | 0.001     |
| I1aA122  | 1a                        | 1                   | 2                 | 2                              | 184.749 | 0.000     |
| I1aA322  | 1a                        | 3                   | 2                 | 2                              | 185.099 | 0.000     |
| I1bA131  | 1b                        | 1                   | 3                 | 1                              | 186.233 | 0.000     |
| I1bA331  | 1b                        | 3                   | 3                 | 1                              | 186.233 | 0.000     |
| I1aA131  | 1a                        | 1                   | 3                 | 1                              | 186.353 | 0.000     |

<sup>1</sup> 1a: virus introduction by migratory birds: Southern spring migrants; 1b: virus introduction by migratory birds, Eastern summer migrants; 2a: Virus overwintering in vectors: *Culex modestus*; 2b: Virus overwintering in vectors: *Cx. pipiens*; 2c : Virus overwintering in vectors: *Cx. modestus* and *Cx. pipiens*

<sup>2</sup> 1: *Cx. modestus*; 2: *Cx. pipiens*; 3: *Cx. modestus* and *Cx. pipiens*

<sup>3</sup> 1: House sparrow and black-billed magpies only; 2: All species, heterogeneous competences; 3 : All species, homogeneous competences

<sup>4</sup> 1: No 'dilution' effects; 2 : Risk decreases with the number of non-competent species ('dilution effect')

| Scenario | Introduction <sup>5</sup> | Amplification       |                   |                                | AIC     | w <sub>AIC</sub> |
|----------|---------------------------|---------------------|-------------------|--------------------------------|---------|------------------|
|          |                           | Vector <sup>6</sup> | Host <sup>7</sup> | 'Dilution effect' <sup>8</sup> |         |                  |
| I2aA221  | 2a                        | 2                   | 2                 | 1                              | 189.053 | 0.000            |
| I2aA222  | 2a                        | 2                   | 2                 | 2                              | 189.053 | 0.000            |
| I2aA231  | 2a                        | 2                   | 3                 | 1                              | 193.361 | 0.000            |
| I2aA321  | 2a                        | 3                   | 2                 | 1                              | 193.396 | 0.000            |
| I2aA322  | 2a                        | 3                   | 2                 | 2                              | 193.396 | 0.000            |
| I2aA121  | 2a                        | 1                   | 2                 | 1                              | 193.432 | 0.000            |
| I2aA122  | 2a                        | 1                   | 2                 | 2                              | 193.432 | 0.000            |
| I2aA131  | 2a                        | 1                   | 3                 | 1                              | 193.432 | 0.000            |
| I2aA331  | 2a                        | 3                   | 3                 | 1                              | 193.432 | 0.000            |
| I2bA131  | 2b                        | 1                   | 3                 | 1                              | 193.432 | 0.000            |
| I2cA131  | 2c                        | 1                   | 3                 | 1                              | 193.432 | 0.000            |
| I1bA221  | 1b                        | 2                   | 2                 | 1                              | 194.305 | 0.000            |
| I1bA222  | 1b                        | 2                   | 2                 | 2                              | 195.082 | 0.000            |
| I1aA111  | 1a                        | 1                   | 1                 | 1                              | 196.903 | 0.000            |
| I1aA112  | 1a                        | 1                   | 1                 | 2                              | 196.903 | 0.000            |
| I2bA322  | 2b                        | 3                   | 2                 | 2                              | 197.093 | 0.000            |
| I1bA212  | 1b                        | 2                   | 1                 | 2                              | 203.955 | 0.000            |
| I1aA212  | 1a                        | 2                   | 1                 | 2                              | 204.008 | 0.000            |
| I1aA312  | 1a                        | 3                   | 1                 | 2                              | 204.008 | 0.000            |
| I2bA212  | 2b                        | 2                   | 1                 | 2                              | 204.008 | 0.000            |
| I2bA312  | 2b                        | 3                   | 1                 | 2                              | 204.008 | 0.000            |
| I2cA212  | 2c                        | 2                   | 1                 | 2                              | 204.008 | 0.000            |
| I2cA312  | 2c                        | 3                   | 1                 | 2                              | 204.008 | 0.000            |
| I1bA112  | 1b                        | 1                   | 1                 | 2                              | 204.247 | 0.000            |
| I1bA312  | 1b                        | 3                   | 1                 | 2                              | 204.247 | 0.000            |
| I2aA112  | 2a                        | 1                   | 1                 | 2                              | 204.247 | 0.000            |
| I2aA212  | 2a                        | 2                   | 1                 | 2                              | 204.247 | 0.000            |
| I2aA312  | 2a                        | 3                   | 1                 | 2                              | 204.247 | 0.000            |
| I2bA112  | 2b                        | 1                   | 1                 | 2                              | 204.247 | 0.000            |
| I2cA112  | 2c                        | 1                   | 1                 | 2                              | 204.247 | 0.000            |
| I1bA231  | 1b                        | 2                   | 3                 | 1                              | 206.641 | 0.000            |
| I1bA211  | 1b                        | 2                   | 1                 | 1                              | 208.644 | 0.000            |
| I1aA211  | 1a                        | 2                   | 1                 | 1                              | 208.673 | 0.000            |
| I2bA211  | 2b                        | 2                   | 1                 | 1                              | 208.673 | 0.000            |
| I2cA211  | 2c                        | 2                   | 1                 | 1                              | 208.673 | 0.000            |
| I1aA331  | 1a                        | 3                   | 3                 | 1                              | 209.247 | 0.000            |

<sup>5</sup> 1a: virus introduction by migratory birds: Southern spring migrants; 1b: virus introduction by migratory birds, Eastern summer migrants; 2a: Virus overwintering in vectors: *Culex modestus*; 2b: Virus overwintering in vectors: *Cx. pipiens*; 2c : Virus overwintering in vectors: *Cx. modestus* and *Cx. pipiens*

<sup>6</sup> 1: *Cx. modestus*; 2: *Cx. pipiens*; 3: *Cx. modestus* and *Cx. pipiens*

<sup>7</sup> 1: House sparrow and black-billed magpies only; 2: All species, heterogeneous competences; 3 : All species, homogeneous competences

<sup>8</sup> 1: No 'dilution' effects; 2 : Risk decreases with the number of non-competent species ('dilution effect')

| Scenario | Introduction <sup>9</sup> | Amplification        |                    |                                 | AIC     | w <sub>AIC</sub> |
|----------|---------------------------|----------------------|--------------------|---------------------------------|---------|------------------|
|          |                           | Vector <sup>10</sup> | Host <sup>11</sup> | 'Dilution effect' <sup>12</sup> |         |                  |
| I2aA211  | 2a                        | 2                    | 1                  | 1                               | 209.709 | 0.000            |
| I1aA231  | 1a                        | 2                    | 3                  | 1                               | 209.864 | 0.000            |
| I2bA231  | 2b                        | 2                    | 3                  | 1                               | 209.864 | 0.000            |
| I2cA231  | 2c                        | 2                    | 3                  | 1                               | 209.864 | 0.000            |
| I2bA331  | 2b                        | 3                    | 3                  | 1                               | 209.878 | 0.000            |
| I2cA331  | 2c                        | 3                    | 3                  | 1                               | 209.878 | 0.000            |
| I1aA311  | 1a                        | 3                    | 1                  | 1                               | 209.932 | 0.000            |
| I2bA311  | 2b                        | 3                    | 1                  | 1                               | 209.932 | 0.000            |
| I2cA311  | 2c                        | 3                    | 1                  | 1                               | 209.932 | 0.000            |
| I1bA111  | 1b                        | 1                    | 1                  | 1                               | 210.006 | 0.000            |
| I1bA311  | 1b                        | 3                    | 1                  | 1                               | 210.006 | 0.000            |
| I2aA111  | 2a                        | 1                    | 1                  | 1                               | 210.006 | 0.000            |
| I2aA311  | 2a                        | 3                    | 1                  | 1                               | 210.006 | 0.000            |
| I2bA111  | 2b                        | 1                    | 1                  | 1                               | 210.006 | 0.000            |
| I2cA111  | 2c                        | 1                    | 1                  | 1                               | 210.006 | 0.000            |

<sup>9</sup> 1a: virus introduction by migratory birds: Southern spring migrants; 1b: virus introduction by migratory birds, Eastern summer migrants; 2a: Virus overwintering in vectors: *Culex modestus*; 2b: Virus overwintering in vectors: *Cx. pipiens*; 2c : Virus overwintering in vectors: *Cx. modestus* and *Cx. pipiens*

<sup>10</sup> 1: *Cx. modestus*; 2: *Cx. pipiens*; 3: *Cx. modestus* and *Cx. pipiens*

<sup>11</sup> 1: House sparrow and black-billed magpies only; 2: All species, heterogeneous competences; 3 : All species, homogeneous competences

<sup>12</sup> 1: No 'dilution' effects; 2 : Risk decreases with the number of non-competent species ('dilution effect')

**Table S9: List of all regression models evaluating the variation in seroprevalence in equines in relation to West Nile Virus spillover index, resulting from the different scenarios of introduction, amplification/dispersal and spillover, Camargue area, Southern France, and ranked according to their normalized Akaike weights ( $w_{AIC}$ )**

| Scenario  | Introduction <sup>13</sup> | Amplification        |                    |                                 | Spillover <sup>†</sup> | AIC     | $w_{AIC}$ |
|-----------|----------------------------|----------------------|--------------------|---------------------------------|------------------------|---------|-----------|
|           |                            | Vector <sup>14</sup> | Host <sup>15</sup> | 'Dilution effect' <sup>16</sup> |                        |         |           |
| I1aA121S3 | 1a                         | 1                    | 2                  | 1                               | 3                      | 725.539 | 0.568     |
| I1bA131S3 | 1b                         | 1                    | 3                  | 1                               | 3                      | 728.330 | 0.141     |
| I1bA331S3 | 1b                         | 3                    | 3                  | 1                               | 3                      | 728.330 | 0.141     |
| I1aA131S3 | 1a                         | 1                    | 3                  | 1                               | 3                      | 729.403 | 0.082     |
| I2aA121S3 | 2a                         | 1                    | 2                  | 1                               | 3                      | 732.239 | 0.020     |
| I2aA122S3 | 2a                         | 1                    | 2                  | 2                               | 3                      | 732.239 | 0.020     |
| I1aA121S2 | 1a                         | 1                    | 2                  | 1                               | 2                      | 736.208 | 0.003     |
| I1aA321S3 | 1a                         | 3                    | 2                  | 1                               | 3                      | 736.428 | 0.002     |
| I1aA121S1 | 1a                         | 1                    | 2                  | 1                               | 1                      | 737.328 | 0.002     |
| I1bA131S1 | 1b                         | 1                    | 3                  | 1                               | 1                      | 737.423 | 0.001     |
| I1bA331S1 | 1b                         | 3                    | 3                  | 1                               | 1                      | 737.423 | 0.001     |
| I1aA122S1 | 1a                         | 1                    | 2                  | 2                               | 1                      | 737.743 | 0.001     |
| I1bA122S1 | 1b                         | 1                    | 2                  | 2                               | 1                      | 738.017 | 0.001     |
| I2aA321S3 | 2a                         | 3                    | 2                  | 1                               | 3                      | 738.555 | 0.001     |
| I2aA322S3 | 2a                         | 3                    | 2                  | 2                               | 3                      | 738.555 | 0.001     |
| I1aA322S1 | 1a                         | 3                    | 2                  | 2                               | 1                      | 738.585 | 0.001     |
| I1bA321S3 | 1b                         | 3                    | 2                  | 1                               | 3                      | 738.594 | 0.001     |
| I2aA131S3 | 2a                         | 1                    | 3                  | 1                               | 3                      | 738.684 | 0.001     |
| I2aA231S3 | 2a                         | 2                    | 3                  | 1                               | 3                      | 738.684 | 0.001     |
| I2aA331S3 | 2a                         | 3                    | 3                  | 1                               | 3                      | 738.684 | 0.001     |
| I2bA131S3 | 2b                         | 1                    | 3                  | 1                               | 3                      | 738.684 | 0.001     |
| I2cA131S3 | 2c                         | 1                    | 3                  | 1                               | 3                      | 738.684 | 0.001     |
| I2cA121S3 | 2c                         | 1                    | 2                  | 1                               | 3                      | 738.801 | 0.001     |
| I1aA321S1 | 1a                         | 3                    | 2                  | 1                               | 1                      | 738.928 | 0.001     |
| I1aA131S1 | 1a                         | 1                    | 3                  | 1                               | 1                      | 739.007 | 0.001     |
| I1bA322S1 | 1b                         | 3                    | 2                  | 2                               | 1                      | 739.096 | 0.001     |
| I2aA121S2 | 2a                         | 1                    | 2                  | 1                               | 2                      | 739.099 | 0.001     |
| I2aA122S2 | 2a                         | 1                    | 2                  | 2                               | 2                      | 739.099 | 0.001     |
| I2bA121S3 | 2b                         | 1                    | 2                  | 1                               | 3                      | 739.642 | 0.000     |
| I1bA321S1 | 1b                         | 3                    | 2                  | 1                               | 1                      | 739.645 | 0.000     |

<sup>13</sup> 1a: virus introduction by migratory birds: Southern spring migrants; 1b: virus introduction by migratory birds, Eastern summer migrants; 2a: Virus overwintering in vectors: *Culex modestus*; 2b: Virus overwintering in vectors: *Cx. pipiens*; 2c : Virus overwintering in vectors: *Cx. modestus* and *Cx. pipiens*

<sup>14</sup> 1: *Cx. modestus*; 2: *Cx. pipiens*; 3: *Cx. modestus* and *Cx. pipiens*

<sup>15</sup> 1: House sparrow and black-billed magpies only; 2: All species, heterogeneous competences; 3 : All species, homogeneous competences

<sup>16</sup> 1: No 'dilution' effects; 2 : Risk decreases with the number of non-competent species ('dilution effect')

| Scenario  | Introduction <sup>17</sup> | Amplification        |                    |                                 | Spillover <sup>†</sup> | AIC     | w <sub>AIC</sub> |
|-----------|----------------------------|----------------------|--------------------|---------------------------------|------------------------|---------|------------------|
|           |                            | Vector <sup>18</sup> | Host <sup>19</sup> | 'Dilution effect' <sup>20</sup> |                        |         |                  |
| I2cA121S1 | 2c                         | 1                    | 2                  | 1                               | 1                      | 741.188 | 0.000            |
| I1aA222S3 | 1a                         | 2                    | 2                  | 2                               | 3                      | 741.442 | 0.000            |
| I2aA121S1 | 2a                         | 1                    | 2                  | 1                               | 1                      | 741.517 | 0.000            |
| I2aA122S1 | 2a                         | 1                    | 2                  | 2                               | 1                      | 741.517 | 0.000            |
| I2bA121S1 | 2b                         | 1                    | 2                  | 1                               | 1                      | 741.766 | 0.000            |
| I1bA122S3 | 1b                         | 1                    | 2                  | 2                               | 3                      | 741.853 | 0.000            |
| I1aA222S1 | 1a                         | 2                    | 2                  | 2                               | 1                      | 741.873 | 0.000            |
| I1aA122S3 | 1a                         | 1                    | 2                  | 2                               | 3                      | 741.929 | 0.000            |
| I1aA221S3 | 1a                         | 2                    | 2                  | 1                               | 3                      | 742.116 | 0.000            |
| I1aA221S1 | 1a                         | 2                    | 2                  | 1                               | 1                      | 742.433 | 0.000            |
| I1aA131S2 | 1a                         | 1                    | 3                  | 1                               | 2                      | 742.646 | 0.000            |
| I2cA122S1 | 2c                         | 1                    | 2                  | 2                               | 1                      | 742.662 | 0.000            |
| I1bA131S2 | 1b                         | 1                    | 3                  | 1                               | 2                      | 742.763 | 0.000            |
| I1bA331S2 | 1b                         | 3                    | 3                  | 1                               | 2                      | 742.763 | 0.000            |
| I2aA321S1 | 2a                         | 3                    | 2                  | 1                               | 1                      | 742.903 | 0.000            |
| I2aA322S1 | 2a                         | 3                    | 2                  | 2                               | 1                      | 742.903 | 0.000            |
| I2aA131S1 | 2a                         | 1                    | 3                  | 1                               | 1                      | 742.949 | 0.000            |
| I2aA231S1 | 2a                         | 2                    | 3                  | 1                               | 1                      | 742.949 | 0.000            |
| I2aA331S1 | 2a                         | 3                    | 3                  | 1                               | 1                      | 742.949 | 0.000            |
| I2bA131S1 | 2b                         | 1                    | 3                  | 1                               | 1                      | 742.949 | 0.000            |
| I2cA131S1 | 2c                         | 1                    | 3                  | 1                               | 1                      | 742.949 | 0.000            |
| I1aA322S3 | 1a                         | 3                    | 2                  | 2                               | 3                      | 743.357 | 0.000            |
| I1aA222S2 | 1a                         | 2                    | 2                  | 2                               | 2                      | 744.574 | 0.000            |
| I2cA121S2 | 2c                         | 1                    | 2                  | 1                               | 2                      | 744.662 | 0.000            |
| I2aA321S2 | 2a                         | 3                    | 2                  | 1                               | 2                      | 744.701 | 0.000            |
| I2aA322S2 | 2a                         | 3                    | 2                  | 2                               | 2                      | 744.701 | 0.000            |
| I2aA131S2 | 2a                         | 1                    | 3                  | 1                               | 2                      | 744.808 | 0.000            |
| I2aA231S2 | 2a                         | 2                    | 3                  | 1                               | 2                      | 744.808 | 0.000            |
| I2aA331S2 | 2a                         | 3                    | 3                  | 1                               | 2                      | 744.808 | 0.000            |
| I2bA131S2 | 2b                         | 1                    | 3                  | 1                               | 2                      | 744.808 | 0.000            |
| I2cA131S2 | 2c                         | 1                    | 3                  | 1                               | 2                      | 744.808 | 0.000            |
| I2cA122S3 | 2c                         | 1                    | 2                  | 2                               | 3                      | 745.224 | 0.000            |
| I1aA221S2 | 1a                         | 2                    | 2                  | 1                               | 2                      | 745.327 | 0.000            |
| I1bA322S3 | 1b                         | 3                    | 2                  | 2                               | 3                      | 745.491 | 0.000            |
| I2bA121S2 | 2b                         | 1                    | 2                  | 1                               | 2                      | 745.702 | 0.000            |
| I1bA121S1 | 1b                         | 1                    | 2                  | 1                               | 1                      | 746.759 | 0.000            |
| I2cA221S1 | 2c                         | 2                    | 2                  | 1                               | 1                      | 747.296 | 0.000            |

<sup>17</sup> 1a: virus introduction by migratory birds: Southern spring migrants; 1b: virus introduction by migratory birds, Eastern summer migrants; 2a: Virus overwintering in vectors: *Culex modestus*; 2b: Virus overwintering in vectors: *Cx. pipiens*; 2c : Virus overwintering in vectors: *Cx. modestus* and *Cx. pipiens*

<sup>18</sup> 1: *Cx. modestus*; 2: *Cx. pipiens*; 3: *Cx. modestus* and *Cx. pipiens*

<sup>19</sup> 1: House sparrow and black-billed magpies only; 2: All species, heterogeneous competences; 3 : All species, homogeneous competences

<sup>20</sup> 1: No 'dilution' effects; 2 : Risk decreases with the number of non-competent species ('dilution effect')

| Scenario  | Introduction <sup>21</sup> | Amplification        |                    |                                 | Spillover <sup>†</sup> | AIC     | w <sub>AIC</sub> |
|-----------|----------------------------|----------------------|--------------------|---------------------------------|------------------------|---------|------------------|
|           |                            | Vector <sup>22</sup> | Host <sup>23</sup> | 'Dilution effect' <sup>24</sup> |                        |         |                  |
| I1bA321S2 | 1b                         | 3                    | 2                  | 1                               | 2                      | 747.530 | 0.000            |
| I2bA221S1 | 2b                         | 2                    | 2                  | 1                               | 1                      | 748.837 | 0.000            |
| I2cA222S1 | 2c                         | 2                    | 2                  | 2                               | 1                      | 749.363 | 0.000            |
| I2cA122S2 | 2c                         | 1                    | 2                  | 2                               | 2                      | 749.399 | 0.000            |
| I2cA221S3 | 2c                         | 2                    | 2                  | 1                               | 3                      | 750.118 | 0.000            |
| I2aA221S1 | 2a                         | 2                    | 2                  | 1                               | 1                      | 750.577 | 0.000            |
| I2aA222S1 | 2a                         | 2                    | 2                  | 2                               | 1                      | 750.577 | 0.000            |
| I2bA222S1 | 2b                         | 2                    | 2                  | 2                               | 1                      | 751.629 | 0.000            |
| I1aA321S2 | 1a                         | 3                    | 2                  | 1                               | 2                      | 751.802 | 0.000            |
| I2cA221S2 | 2c                         | 2                    | 2                  | 1                               | 2                      | 752.050 | 0.000            |
| I2bA221S3 | 2b                         | 2                    | 2                  | 1                               | 3                      | 752.308 | 0.000            |
| I2cA222S3 | 2c                         | 2                    | 2                  | 2                               | 3                      | 752.740 | 0.000            |
| I2bA221S2 | 2b                         | 2                    | 2                  | 1                               | 2                      | 753.852 | 0.000            |
| I2cA222S2 | 2c                         | 2                    | 2                  | 2                               | 2                      | 754.058 | 0.000            |
| I2aA221S3 | 2a                         | 2                    | 2                  | 1                               | 3                      | 754.450 | 0.000            |
| I2aA222S3 | 2a                         | 2                    | 2                  | 2                               | 3                      | 754.450 | 0.000            |
| I1bA122S2 | 1b                         | 1                    | 2                  | 2                               | 2                      | 755.294 | 0.000            |
| I1aA122S2 | 1a                         | 1                    | 2                  | 2                               | 2                      | 755.379 | 0.000            |
| I2bA222S3 | 2b                         | 2                    | 2                  | 2                               | 3                      | 755.947 | 0.000            |
| I1aA322S2 | 1a                         | 3                    | 2                  | 2                               | 2                      | 756.004 | 0.000            |
| I1bA322S2 | 1b                         | 3                    | 2                  | 2                               | 2                      | 756.015 | 0.000            |
| I1bA121S3 | 1b                         | 1                    | 2                  | 1                               | 3                      | 756.538 | 0.000            |
| I2aA221S2 | 2a                         | 2                    | 2                  | 1                               | 2                      | 756.650 | 0.000            |
| I2aA222S2 | 2a                         | 2                    | 2                  | 2                               | 2                      | 756.650 | 0.000            |
| I2bA222S2 | 2b                         | 2                    | 2                  | 2                               | 2                      | 756.970 | 0.000            |
| I1bA121S2 | 1b                         | 1                    | 2                  | 1                               | 2                      | 759.465 | 0.000            |

<sup>21</sup> 1a: virus introduction by migratory birds: Southern spring migrants; 1b: virus introduction by migratory birds, Eastern summer migrants; 2a: Virus overwintering in vectors: *Culex modestus*; 2b: Virus overwintering in vectors: *Cx. pipiens*; 2c : Virus overwintering in vectors: *Cx. modestus* and *Cx. pipiens*

<sup>22</sup> 1: *Cx. modestus*; 2: *Cx. pipiens*; 3: *Cx. modestus* and *Cx. pipiens*

<sup>23</sup> 1: House sparrow and black-billed magpies only; 2: All species, heterogeneous competences; 3 : All species, homogeneous competences

<sup>24</sup> 1: No 'dilution' effects; 2 : Risk decreases with the number of non-competent species ('dilution effect')
